# Supplementary material for: 3D heterogeneous CTF@TiO2/Bi2WO6/Au hybrid supported by hollow carbon tubes and its efficient photocatalytic performance in the UV-vis range
Source: Royal Society of Chemistry journal article supplement (doi:10.1039/d0en00307g), 2020-01-01
Supplement: d0en00307g1.pdf [file d0en00307g1.pdf]

## Supporting Information

### **3D Heterogeneous CTF@TiO<sub>2</sub>/Bi<sub>2</sub>WO<sub>6</sub>/Au Hybrids Supported by Hollow Carbon Tubes and Their Efficient Photocatalytic Performance in The UV-vis Range**

Aiqin Gao,<sup>a</sup> Ju Wang,<sup>a</sup> Huanghuang Chen,<sup>b</sup> Aiqin Hou,<sup>b</sup> Kongliang Xie<sup>\*a</sup>

<sup>a</sup>*College of Chemistry, Chemical Engineering and Biotechnology, Donghua University, Shanghai 201620, PR China*

*Corresponding to: klxie@dhu.edu.cn*

<sup>b</sup>*National Engineering Research Center for Dyeing and Finishing of Textiles, Donghua University, Shanghai 200051, China*

#### **Supporting data**

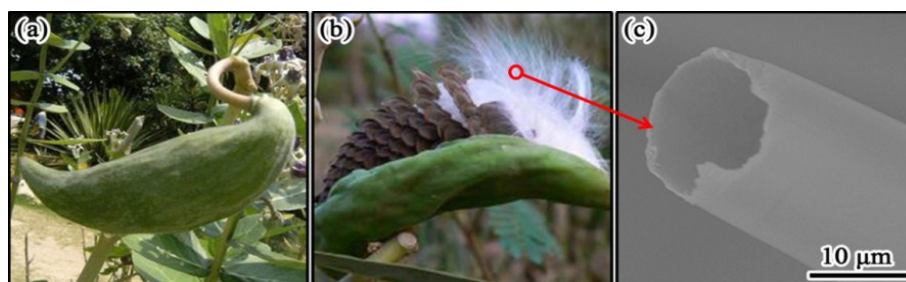

**Figure S1.** Photographs of the (a) CG plant and (b) ripe fruit and SEM image of CGF.

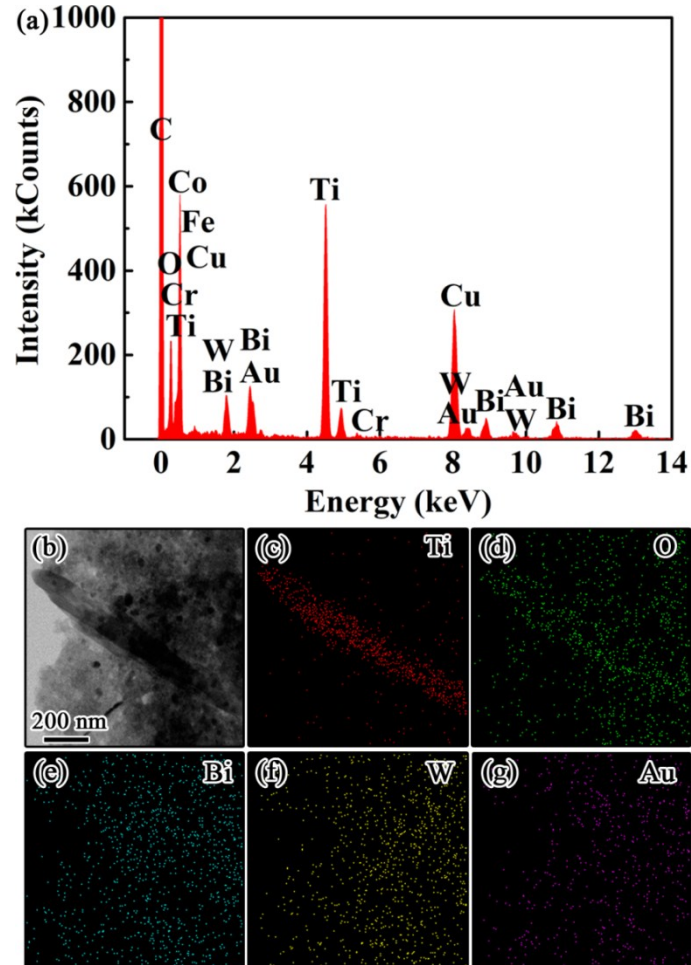

**Figure S2.** (a) EDS pattern and (b-g) elemental mapping images of the  $\text{TiO}_2/\text{Bi}_2\text{WO}_6/\text{Au}$  sample peeled from  $\text{CTF}@\text{TiO}_2/\text{Bi}_2\text{WO}_6/\text{Au}$ .

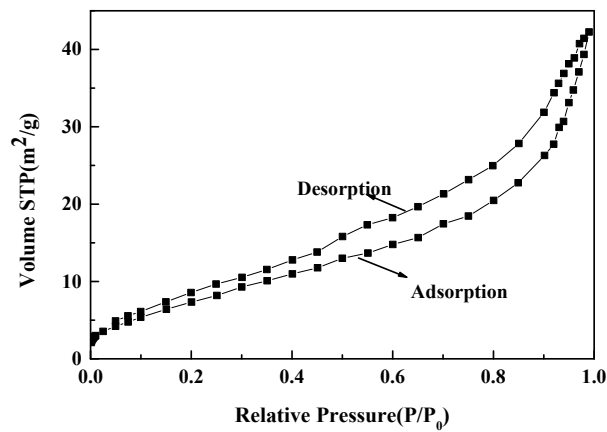

**Figure S3.**  $\text{N}_2$  adsorption-desorption curve of  $\text{CTF}@\text{TiO}_2/\text{Bi}_2\text{WO}_6/\text{Au}$ .

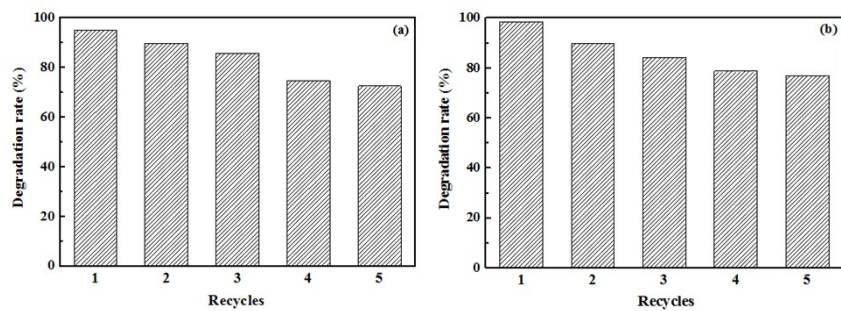

**Figure S4.** Recyclability of CTF@TiO<sub>2</sub>/Bi<sub>2</sub>WO<sub>6</sub>/Au under (a) UV light and (b) visible light irradiation.
